# Supplementary material
Source: PubMed Central journal article supplement (PMC8292151)
Supplement: NIHMS1647795-supplement-supporting_information.pdf [file NIHMS1647795-supplement-supporting_information.pdf]

Supporting information for:

## **Advances and Challenges in Small-Molecule DNA Aptamer Isolation, Characterization, and Sensor Development**

Haixiang Yu<sup>†</sup>, Obtin Alkhamis<sup>†</sup>, Juan Canoura, Yingzhu Liu and Yi Xiao<sup>\*</sup>

Department of Chemistry and Biochemistry, Florida International University, 11200 SW 8th Street, Miami, FL, USA, 33199

<sup>†</sup>These authors contributed equally to this work.

<sup>\*</sup>Corresponding author: yxiao2@fiu.edu

**Table S1.** Advantages and limitations of methods used for characterizing aptamer affinity.

| <b>Method</b>              | <b>Advantages</b>                                                                 | <b>Main limitations</b>                                                                                                                                |
|----------------------------|-----------------------------------------------------------------------------------|--------------------------------------------------------------------------------------------------------------------------------------------------------|
| <b>ITC</b>                 | Solution-phase binding; label free; provides binding dynamics and stoichiometries | Requires high concentration of aptamer and ligand                                                                                                      |
| <b>SPR</b>                 | Provides kinetic metrics such as $k_{on}$ and $k_{off}$                           | Requires immobilization of either aptamer or target                                                                                                    |
| <b>MST</b>                 | Applicable to complex matrices                                                    | Ligand must be fluorescent, or aptamer needs to be fluorescently labeled                                                                               |
| <b>FP</b>                  | Solution-phase binding                                                            | Ligand must be fluorescent, or aptamer needs to be fluorescently labeled; optimization of label position is required; label can alter binding affinity |
| <b>Bead assay</b>          | Simple; does not require specialized instrumentation                              | Non-specific binding to beads can cause false positives; affinity can be affected by conjugation                                                       |
| <b>Strand displacement</b> | Simple; does not require specialized instrumentation                              | Only works with stem-loop structured aptamers; requires fluorescent labeling                                                                           |

**Table S2.** Comparison of sensing mechanisms and signal reporters used in aptamer-based sensors.

|                           | <b>Advantage</b>                                            | <b>Limitation</b>                                                                                                  |
|---------------------------|-------------------------------------------------------------|--------------------------------------------------------------------------------------------------------------------|
| <b>Sensing mechanism</b>  |                                                             |                                                                                                                    |
| Aptamer folding           | Rapid; single-aptamer construct                             | High background; requires careful aptamer engineering                                                              |
| Aptamer assembly          | Rapid; low background; compatible with signal amplification | Low affinity of aptamer leads to low sensitivity (but this can be improved with CBSA-based sensors)                |
| Strand displacement       | Simple assay development                                    | Low sensitivity                                                                                                    |
| Dye-displacement          | High sensitivity; minimum aptamer engineering; label-free   | Requires a dye that binds the aptamer and can be displaced by target                                               |
| Exonuclease digestion     | Label-free; generalizable; high sensitivity                 | Long turn-around time, not ideal for on-site detection due to use of enzymes                                       |
| <b>Signaling reporter</b> |                                                             |                                                                                                                    |
| Fluorescent label         | Sensitive                                                   | Requires aptamer labeling; best suited for testing in lab settings                                                 |
| Electrochemical label     | Portable; highly selective                                  | Requires aptamer immobilization                                                                                    |
| Colorimetric - dye        | Naked-eye detection feasible                                | Requires a dye that binds to the aptamer and can be displaced by target; high sensitivity requires instrumentation |
| Colorimetric - AuNPs      | Naked-eye detection feasible                                | Usually requires aptamer immobilization; low sensitivity                                                           |
